# Supplementary material for: FeMo–N nanosheet arrays supported on nickel foam for efficient electrocatalytic N2 reduction to NH3 under ambient conditions
Source: Royal Society of Chemistry journal article supplement (doi:10.1039/d2nj02892a), 2022-01-01
Supplement: d2nj02892a2.pdf [file d2nj02892a2.pdf]

## *Supporting Information*

### **FeMo-N nanosheet arrays supported on nickel foam for efficient electrocatalytic reduction of N<sub>2</sub> to NH<sub>3</sub> at ambient condition**

Kun Jiang, Kai Li, Shuirong Li, Yan Li, Tao Li, Yun-Quan Liu\*, Duo Wang, and Yueyuan Ye

College of Energy, Xiamen University, Xiamen 361102, China.

\*Corresponding author.

E-mail address: yq\_liu@xmu.edu.cn (Yun-Quan Liu)

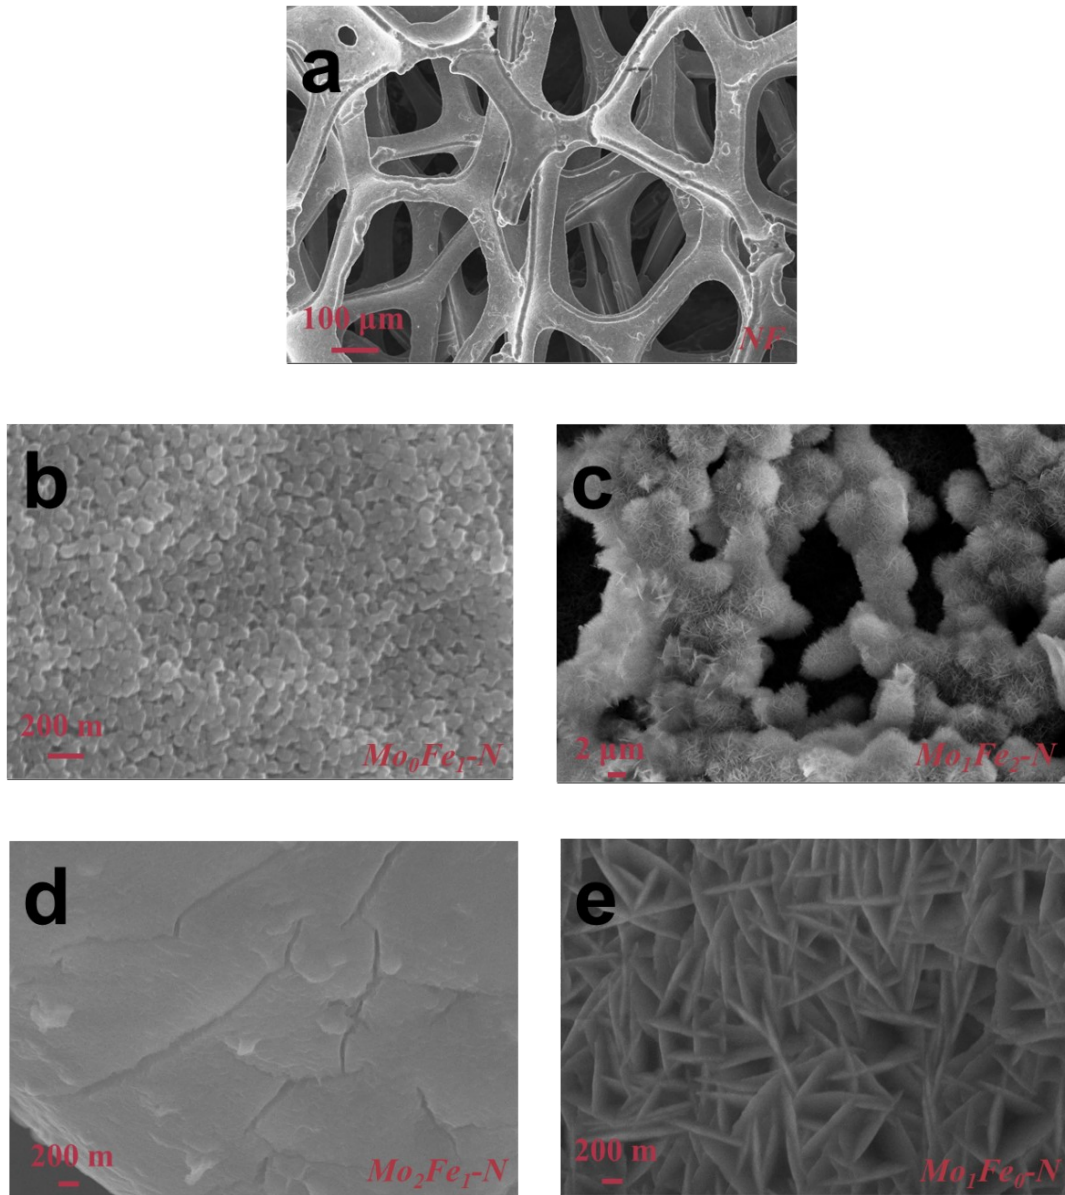

**Figure. S1** SEM images for NF and for  $\text{Fe}_m\text{Mo}_n\text{-N}$  at other molar ratios.

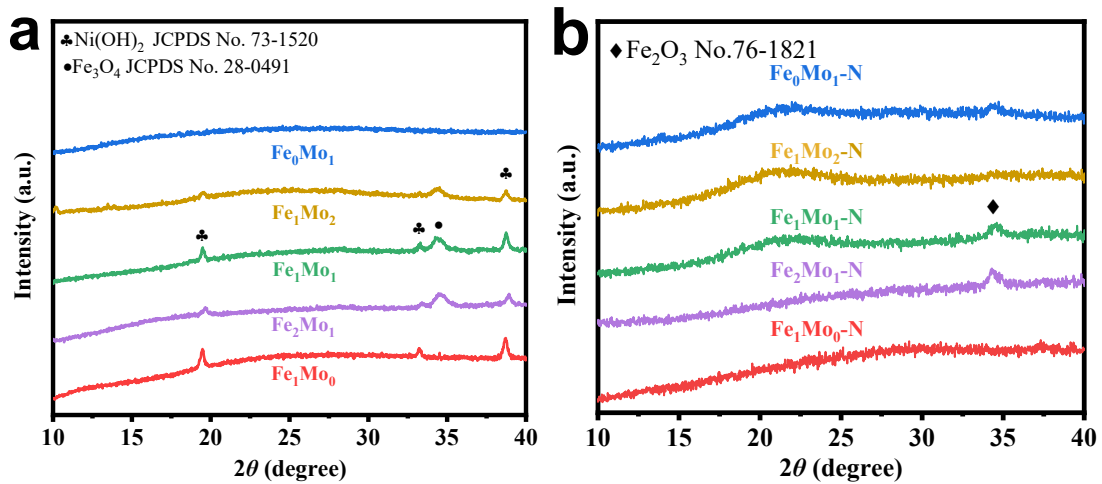

Figure. S2 XRD patterns of (a) Fe<sub>m</sub>Mo<sub>n</sub> and (b) Fe<sub>m</sub>Mo<sub>n</sub>-N.

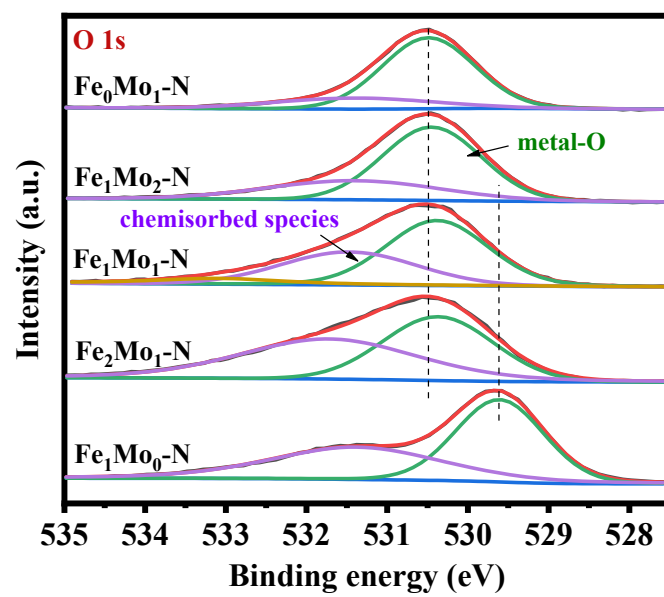

**Figure. S3** High-resolution XPS spectra of O 1s for  $\text{Fe}_m\text{Mo}_n\text{-N}$ .

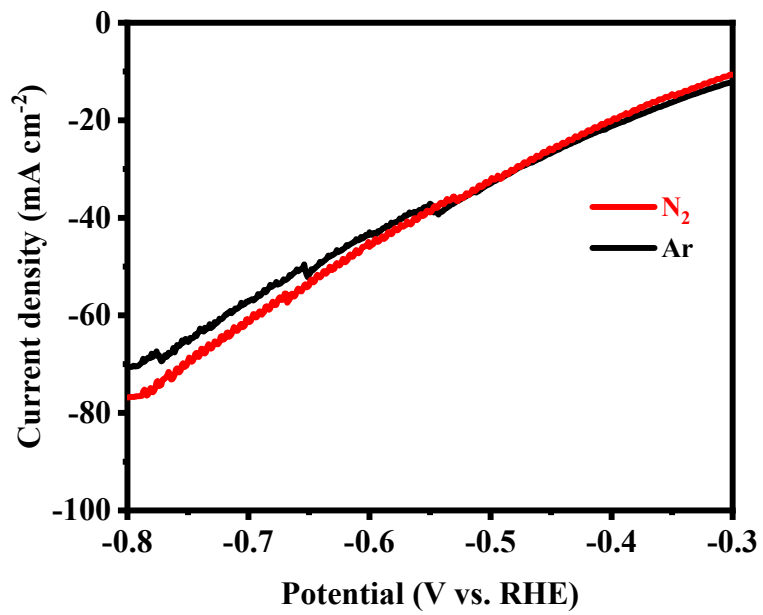

**Figure. S4** LSV curves of Fe<sub>1</sub>Mo<sub>1</sub>-N for NRR in N<sub>2</sub>- (red line) and Ar- (black line) saturated electrolytes with a scan rate of 5 mV s<sup>-1</sup>.

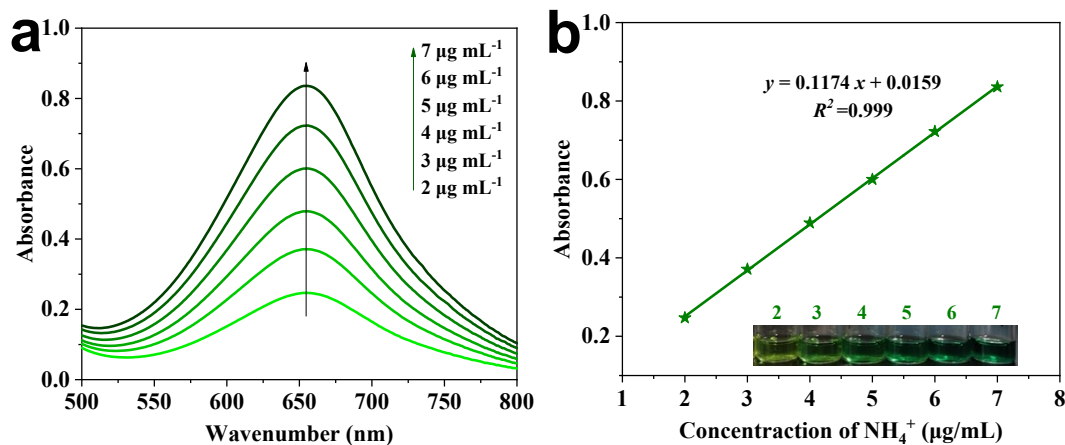

**Figure. S5** (a) UV-Vis spectra of indophenol assays with  $\text{NH}_4^+$  concentrations after incubated for 2 h at room temperature. (b) Calibration curve used for calculation of  $\text{NH}_4^+$  concentrations.

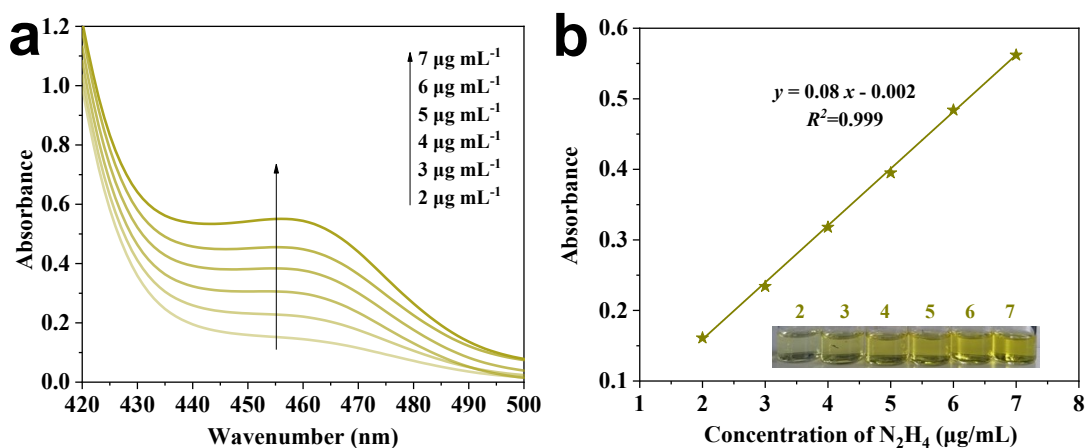

**Figure. S6** (a) UV-Vis adsorption spectra of various  $\text{N}_2\text{H}_4$  concentrations after incubated for 10 min at room temperature. (b) Calibration curve used for calculation of  $\text{N}_2\text{H}_4$  concentrations.

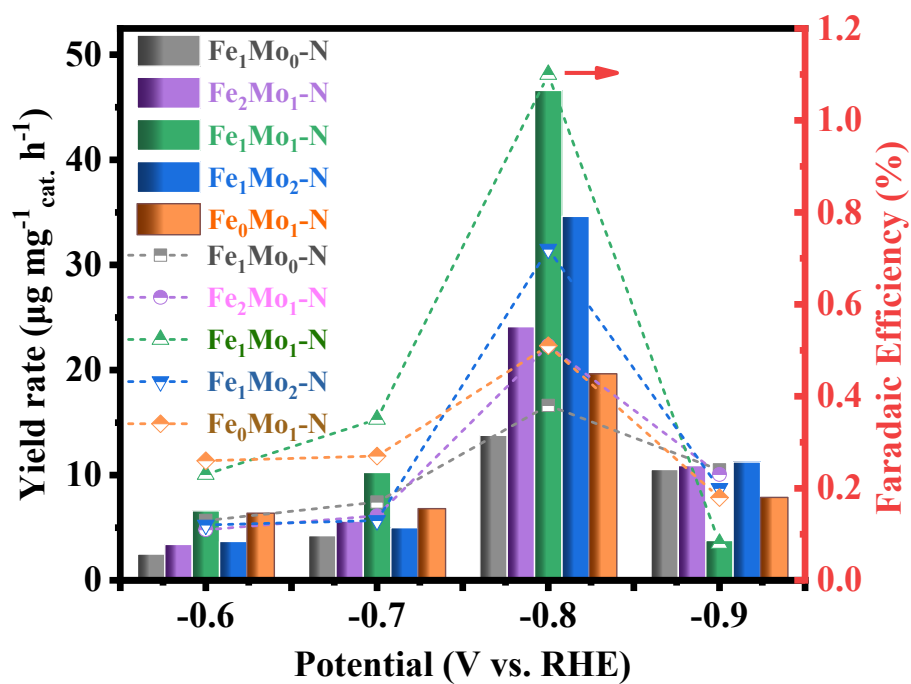

**Figure. S7** NH<sub>3</sub> yield rates and FEs of different molar ratios of Fe<sub>m</sub>Mo<sub>n</sub>-N in 0.05 M H<sub>2</sub>SO<sub>4</sub> at different potentials.

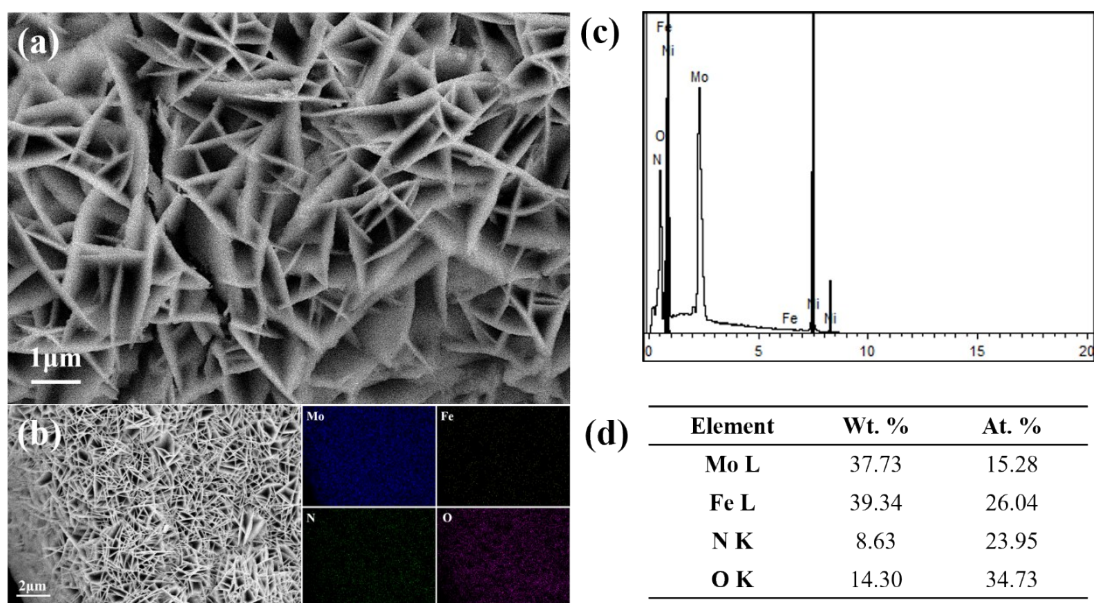

**Figure. S8** (a) nanostructure image; (b) element mapping; (c) element spectrum; (d) element content of SEM of  $\text{Fe}_1\text{Mo}_1\text{-N}$  after 10 h chronoamperometry test.

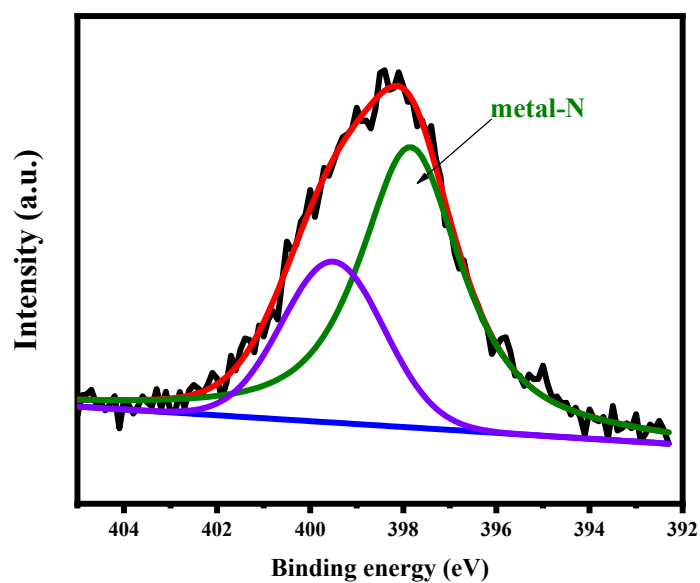

**Figure. S9** XPS spectra in N 1s region for  $\text{Fe}_1\text{Mo}_1\text{-N}$  after 10 h chronoamperometry in Ar-saturated 0.05 M  $\text{H}_2\text{SO}_4$  electrolyte.



**Table S1.** Elemental atom ratio of Fe<sub>m</sub>Mo<sub>n</sub>-N determined by XPS peak area.

| Sample                             | Mo <sup>4+</sup> /Mo <sup>6+</sup> | Fe <sup>2+</sup> /Fe <sup>3+</sup> | N atomic %   | N atomic of M-N % |
|------------------------------------|------------------------------------|------------------------------------|--------------|-------------------|
| Fe <sub>1</sub> Mo <sub>0</sub> -N | /                                  | 0.97                               | <b>1.83</b>  | /                 |
| Fe <sub>2</sub> Mo <sub>1</sub> -N | 0.99                               | 1.00                               | <b>19.51</b> | 10.77             |
| Fe <sub>1</sub> Mo <sub>1</sub> -N | 0.96                               | 1.00                               | <b>32.14</b> | 18.52             |
| Fe <sub>1</sub> Mo <sub>2</sub> -N | 1.09                               | 1.00                               | <b>29.04</b> | 16.66             |
| Fe <sub>0</sub> Mo <sub>1</sub> -N | 1.22                               | /                                  | <b>26.11</b> | 14.67             |

**Table S2.** Comparison of the NH<sub>3</sub> yield rate and FE of Fe<sub>1</sub>Mo<sub>1</sub>-N with other reported NRR electrocatalysts under ambient atmosphere.

| Catalyst                            | Electrolyte                               | NH <sub>3</sub> yield/ $\mu\text{g mg}^{-1}\text{mg. h}^{-1}$ | FE/%        | Reference          |
|-------------------------------------|-------------------------------------------|---------------------------------------------------------------|-------------|--------------------|
| Fe <sub>1</sub> Mo <sub>1</sub> -N  | <b>0.05 M H<sub>2</sub>SO<sub>4</sub></b> | <b>46.64</b>                                                  | <b>1.43</b> | <b>This work</b>   |
| FeTPPCl                             | 0.1 M Na <sub>2</sub> SO <sub>4</sub>     | 18.28                                                         | 16.76       | [1] <sup>1</sup>   |
| BCN                                 | 0.05M Na <sub>2</sub> SO <sub>4</sub>     | 41.9                                                          | 9.87        | [2] <sup>2</sup>   |
| P-TiO <sub>2</sub>                  | 0.1 M LiClO <sub>4</sub>                  | 23.05                                                         | 12.26       | [3] <sup>3</sup>   |
| PdPb/C                              | 0.1 M HCl                                 | 37.68                                                         | 5.79        | [4] <sup>4</sup>   |
| Ru-NC                               | 0.1 KOH                                   | 16.68                                                         | 14.23       | [5] <sup>5</sup>   |
| Fe-(O-C <sub>2</sub> ) <sub>4</sub> | 0.1 KOH                                   | 32.1                                                          | 29.3        | [6] <sup>6</sup>   |
| Fe/Mo <sub>2</sub> C                | 0.5 M Na <sub>2</sub> SO <sub>4</sub>     | ~37                                                           | 20.1        | [7] <sup>7</sup>   |
| Mo-FeS <sub>2</sub>                 | 0.1 KOH                                   | 26.15                                                         | 14.41       | [8] <sup>8</sup>   |
| NiFe-NF                             | 0.1 M Na <sub>2</sub> SO <sub>4</sub>     | 16.89                                                         | 12.50       | [9] <sup>9</sup>   |
| Mo <sub>2</sub> CTX                 | 0.5 M K <sub>2</sub> SO <sub>4</sub>      | 40.57                                                         | 25.77       | [10] <sup>10</sup> |
| CN/C                                | 2 M H <sub>2</sub> SO <sub>4</sub>        | 2.9                                                           | 62.1        | [11] <sup>11</sup> |
| Mo-Mo <sub>2</sub> C/NCNTs          | 0.005 M H <sub>2</sub> SO <sub>4</sub>    | 16.1                                                          | 7.1         | [12] <sup>12</sup> |
| Cu <sub>9</sub> S <sub>5</sub>      | 0.5 M Na <sub>2</sub> SO <sub>4</sub>     | 10.8                                                          | 35          | [13] <sup>13</sup> |
| CaCoO <sub>x</sub>                  | 0.05 M Na <sub>2</sub> SO <sub>4</sub>    | 16.25                                                         | 20.51       | [14] <sup>14</sup> |
| $\beta$ -FeOOH                      | 0.5 M LiClO <sub>4</sub>                  | 42.38                                                         | 9.02        | [15] <sup>15</sup> |

## Notes and References

1. X. X. Yang, S. Sun, L. Meng, K. Li, S. Mukherjee, X. Y. Chen, J. Q. Lv, S. Liang, H. Y. Zang, L. K. Yan and G. Wu, *Applied Catalysis B-Environmental*, 2021, **285**, 119794.
2. B. Chang, L. L. Li, D. Shi, H. H. Jiang, Z. Z. Ai, S. Z. Wang, Y. L. Shao, J. X. Shen, Y. Z. Wu, Y. L. Li and X. P. Hao, *Applied Catalysis B-Environmental*, 2021, **283**, 119622.
3. P. Zhao, L. Zhang, J. Song, S. Wen and Z. Cheng, *Applied Surface Science*, 2020, **523**, 146517.
4. H. Zhao, D. Zhang, Z. C. Wang, Y. Han, X. M. Sun, H. D. Li, X. K. Wu, Y. Pan, Y. N. Qin, S. Y. Lin, Z. K. Xu, J. P. Lai and L. Wang, *Applied Catalysis B-Environmental*, 2020, **265**, 118411.
5. Z. Q. Zhang, K. D. Yao, L. C. Cong, Z. C. Yu, L. N. Qu and W. M. Huang, *Catalysis Science & Technology*, 2020, **10**, 1336-1342.
6. S. B. Zhang, M. Jin, T. F. Shi, M. M. Han, Q. Sun, Y. Lin, Z. H. Ding, L. R. Zheng, G. Z. Wang, Y. X. Zhang, H. M. Zhang and H. J. Zhao, *Angewandte Chemie-International Edition*, 2020, **59**, 13423-13429.
7. T. T. Wang, Z. K. Kou, J. Zhang, H. D. Wang, Y. J. Zeng, S. R. Wei and H. Zhang, *Chemical Engineering Journal*, 2021, **417**, 127924.
8. H. B. Wang, J. Q. Wang, R. Zhang, C. Q. Cheng, K. W. Qu, Y. J. Yang, J. Mao, H. Liu, M. Du, C. K. Dong and X. W. Du, *Acs Catalysis*, 2020, **10**, 4914-4921.
9. Y. Sun, T. Jiang, J. Duan, L. Jiang, X. Hu, H. Zhao, J. Zhu, S. Chen and X. Wang, *ACS Catalysis*, 2020, **10**, 11371-11379.
10. W. Peng, M. Luo, X. D. Xu, K. Jiang, M. Peng, D. C. Chen, T. S. Chan and Y. W. Tan, *Advanced Energy Materials*, 2020, **10**, 2001364.
11. G. M. Peng, J. W. Wu, M. Z. Wang, J. Niklas, H. Zhou and C. Liu, *Nano Lett*, 2020, **20**, 2879-2885.
12. Y. Ma, T. Yang, H. Zou, W. Zang, Z. Kou, L. Mao, Y. Feng, L. Shen, S. J. Pennycook, L. Duan, X. Li and J. Wang, *Adv Mater*, 2020, **32**, 2002177.
13. H. S. Kim, J. Choi, J. Kong, H. Kim, S. J. Yoo and H. S. Park, *Acs Catalysis*, 2021, **11**, 435-445.
14. X. Y. Chen, K. Li, X. X. Yang, J. Q. Lv, S. Sun, S. Q. Li, D. M. Cheng, B. Li, Y. G. Li and H. Y. Zang, *Nano Research*, 2021, **14**, 501-506.
15. X. Zhu, Z. Liu, H. Wang, R. Zhao, H. Chen, T. Wang, F. Wang, Y. Luo, Y. Wu and X. Sun,

*Chem Commun (Camb)*, 2019, **55**, 3987-3990.
